# Supplementary material
Source: Royal Society of Chemistry journal article supplement (doi:10.1039/d6ta02477g)
Supplement: d6ta02477g1.pdf [file d6ta02477g1.pdf]

## Supporting Information

### **Spectroscopy evidence for directional oxygen ionic transport in correlated oxide heterostructures with tunable migration dynamics**

*Xuanchi Zhou<sup>1,2\*</sup>, Xiaohui Yao<sup>1</sup>, Xiaomei Qiao<sup>1</sup>*

*<sup>1</sup> Key Laboratory of Magnetic Molecules and Magnetic Information Materials of Ministry of Education & School of Materials Science and Engineering, Shanxi Normal University, Taiyuan, 030031, China*

*<sup>2</sup> Research Institute of Materials Science, Shanxi Key Laboratory of Advanced Magnetic Materials and Devices, Shanxi Normal University, Taiyuan 030031, China*

\*Authors to whom correspondence should be addressed: [xuanchizhou@sxnu.edu.cn](mailto:xuanchizhou@sxnu.edu.cn)  
(X. Zhou).

#### **This file includes:**

Supplementary Figures 1-14, Supplementary Table 1 and Supplementary References.

## Contents

**Figure S1. Comparison of thermal annealing and chemical potential gradient for engineering oxygen vacancies.**

**Figure S2. HRTEM image for VO<sub>2</sub>/Al<sub>2</sub>O<sub>3</sub> (0001) heterostructure.**

**Figure S3. Surface morphology and thickness of VO<sub>2</sub> film deposited on Al<sub>2</sub>O<sub>3</sub> substrate using AFM technique.**

**Figure S4. AFM images for the VO<sub>2</sub>/Al<sub>2</sub>O<sub>3</sub> heterostructure with and without the TiO<sub>2</sub> overlayer.**

**Figure S5. Comparison of the TiO<sub>2</sub>/VO<sub>2</sub> system fabricated under oxygen-rich conditions.**

**Figure S6. The  $\rho$ - $T$  curves for bare TiO<sub>2</sub> film deposited on  $c$ -plane Al<sub>2</sub>O<sub>3</sub> substrate.**

**Figure S7. Comparing the  $\rho$ - $T$  curves for VO<sub>2</sub> films through vacuum annealing and  $\Delta\mu_{\text{O}}$ -driven oxygen ionic transport.**

**Figure S8. The  $\rho$ - $T$  curves for TiO<sub>2</sub>/VO<sub>2</sub>/Al<sub>2</sub>O<sub>3</sub> heterostructure through oxidative annealing.**

**Figure S9. Repeatability experiment for  $\Delta\mu_{\text{O}}$ -induced oxygen ionic transport.**

**Figure S10. XRD patterns compared for the VO<sub>2</sub>/Al<sub>2</sub>O<sub>3</sub> heterostructure with and without TiO<sub>2</sub> overlayer.**

**Figure S11. sXAS spectra of TiO<sub>2</sub>/VO<sub>2</sub> system with an ultrathin TiO<sub>2</sub> overlayer.**

**Figure S12. XPS survey and Ti 2 $p$  spectra of TiO<sub>2</sub>/VO<sub>2</sub> system.**

**Figure S13. O- $K$  edge sXAS spectra compared for TiO<sub>2</sub> overlayer deposited under different oxygen pressures.**

**Figure S14. O- $K$  edge sXAS spectrum of the grown VO<sub>2</sub> film on  $m$ -plane Al<sub>2</sub>O<sub>3</sub> substrate.**

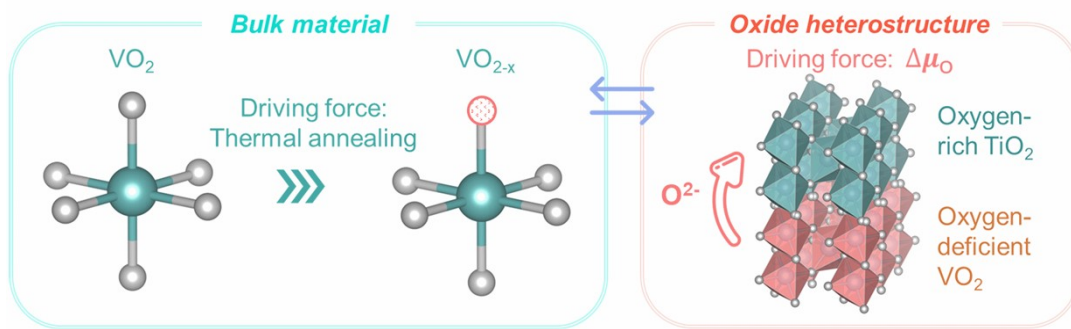

**Supplementary Figure 1.** Schematic of thermal annealing and chemical potential gradient strategies for introducing oxygen vacancies in oxide materials. In single bulk material, thermal annealing in an oxygen-deficient atmosphere is commonly employed to introduce abundant oxygen vacancies.<sup>1,2</sup> Beyond that, the built-in oxygen chemical potential gradient ( $\Delta\mu_{\text{O}}$ ) across the  $\text{TiO}_2/\text{VO}_2$  system introduces an innovative strategy to spontaneously drive the unidirectional oxygen ionic transport in oxide heterostructures.<sup>3-5</sup> This  $\Delta\mu_{\text{O}}$  gradient drives controllable oxygen ionic migration across the oxide heterointerface from underlying  $\text{VO}_2$  layer to  $\text{TiO}_2$  overlayer, giving rise to oxygen-deficient states in  $\text{VO}_2$  and oxygen-enriched states in  $\text{TiO}_2$ .

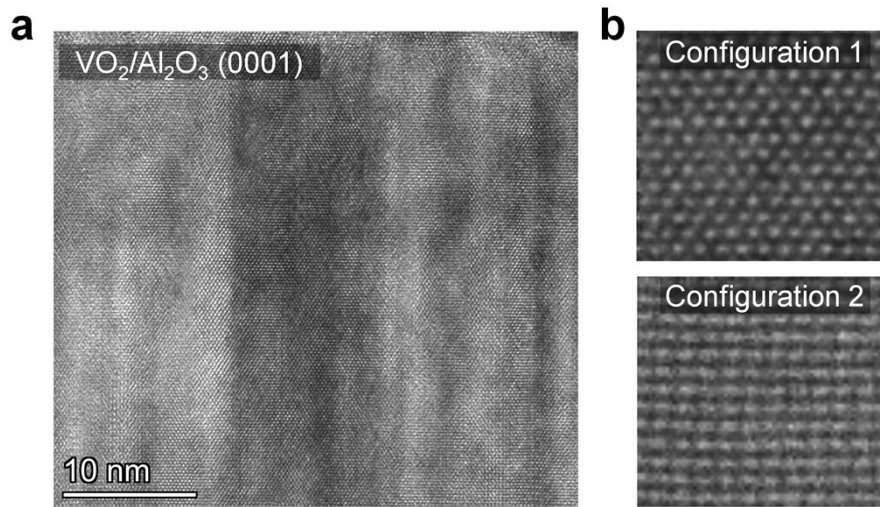

**Supplementary Figure 2. a**, Cross-sectional high-resolution transmission electron microscopy (HRTEM) image of the as-grown VO<sub>2</sub> film on an Al<sub>2</sub>O<sub>3</sub> (0001) substrate. **b**, Two distinct atomic configurations in the VO<sub>2</sub> lattice deposited on the *c*-plane Al<sub>2</sub>O<sub>3</sub> template, forming a vertically aligned domain boundaries within the heterostructure. The symmetry mismatch and  $\beta$  angular deviation between the rutile VO<sub>2</sub> film and the hexagonal Al<sub>2</sub>O<sub>3</sub> substrate lead to the formation of possibly existed twin variants, in turn, resulting in a vertically aligned domain boundary structure.<sup>6, 7</sup>

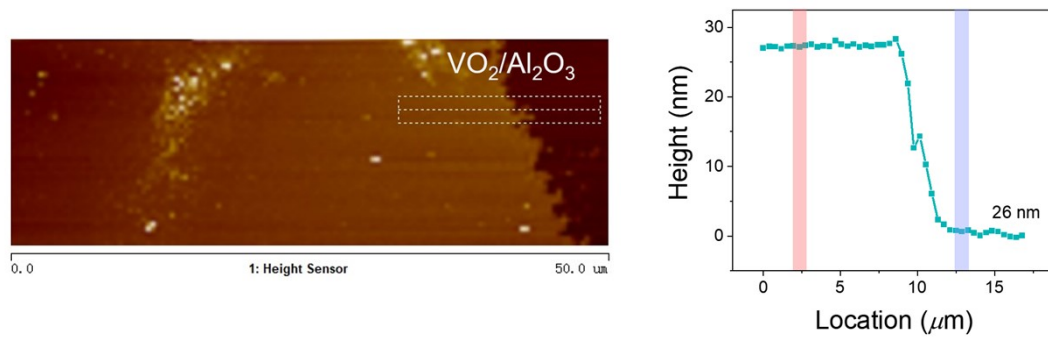

**Supplementary Figure 3.** Atomic force microscopy (AFM) topography images for the as-grown  $\text{VO}_2/\text{Al}_2\text{O}_3$  (0001) heterostructure. It is found that the thickness for the underlying  $\text{VO}_2$  film in  $\text{TiO}_2/\text{VO}_2$  system is estimated to be around 26 nm via using AFM techniques.

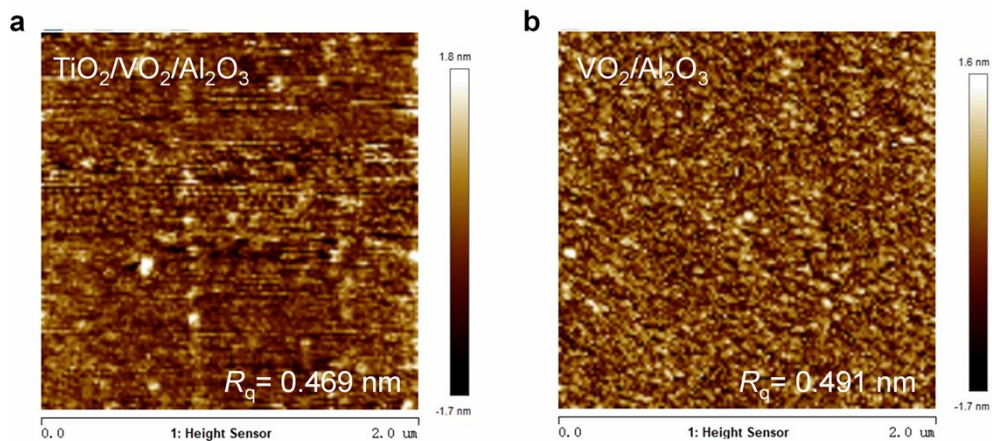

**Supplementary Figure 4.** Atomic force microscope (AFM) images for **a**, TiO<sub>2</sub>/VO<sub>2</sub>/Al<sub>2</sub>O<sub>3</sub> heterostructure and **b**, VO<sub>2</sub>/Al<sub>2</sub>O<sub>3</sub> heterostructure. The atomically smooth film surfaces of as-grown TiO<sub>2</sub>/VO<sub>2</sub> heterostructure are identified by using AFM technique, with a root-mean-square roughness ( $R_q$ ) on the order of 0.5 nm being identified. The  $R_q$  value of heterostructure surface is not pronouncedly altered via the introduction of TiO<sub>2</sub> overlayer.

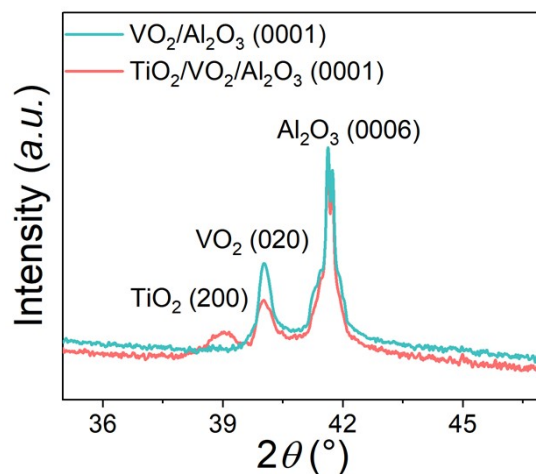

**Supplementary Figure 5.** X-ray diffraction (XRD) patterns for TiO<sub>2</sub>/VO<sub>2</sub>/Al<sub>2</sub>O<sub>3</sub> heterostructures with the deposition of TiO<sub>2</sub> overlayer at 600 °C and 5 Pa. Depositing the TiO<sub>2</sub> overlayer under an oxygen-rich conditions leads to the formation of crystalline TiO<sub>2</sub>, as evidenced by the characteristic diffraction peaks associated with the (002) plane of TiO<sub>2</sub>. This observation starkly differs from an amorphous TiO<sub>2</sub> overlayer under mild growth conditions (e.g., 250 °C, 1 Pa), without the Bragg reflections being detected.

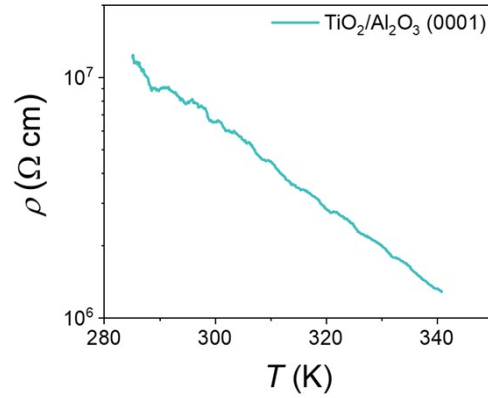

**Supplementary Figure 6.** The  $\rho$ - $T$  curves for bare TiO<sub>2</sub> film deposited on *c*-plane Al<sub>2</sub>O<sub>3</sub> substrate. The top TiO<sub>2</sub> overlayer was found to be insulating, and the Al<sub>2</sub>O<sub>3</sub> substrate was also highly insulating. Therefore, the electrical transport properties of the TiO<sub>2</sub>/VO<sub>2</sub>/Al<sub>2</sub>O<sub>3</sub> heterostructure were determined to originate mainly from the VO<sub>2</sub> layer.

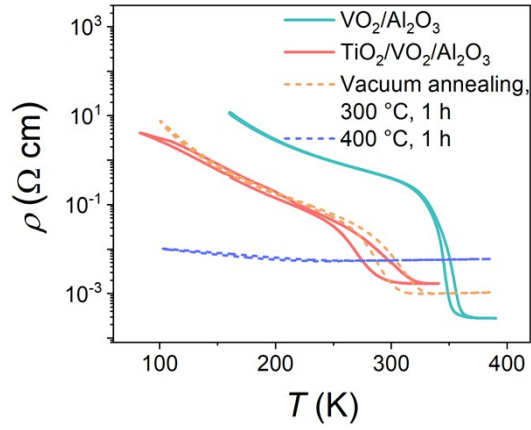

**Supplementary Figure 7.** Comparing the  $\rho$ - $T$  curves for  $\text{VO}_2$  films through vacuum annealing and  $\Delta\mu_{\text{O}}$ -driven oxygen ionic transport. When vacuum-annealed  $\text{VO}_2$  films were compared with  $\Delta\mu_{\text{O}}$ -driven  $\text{TiO}_2/\text{VO}_2$  samples, it was found that although complete metallization is achievable through extensive vacuum annealing,  $\Delta\mu_{\text{O}}$ -driven oxygen ionic transport proves more effective than a milder vacuum annealing treatment, providing a more controllable pathway.

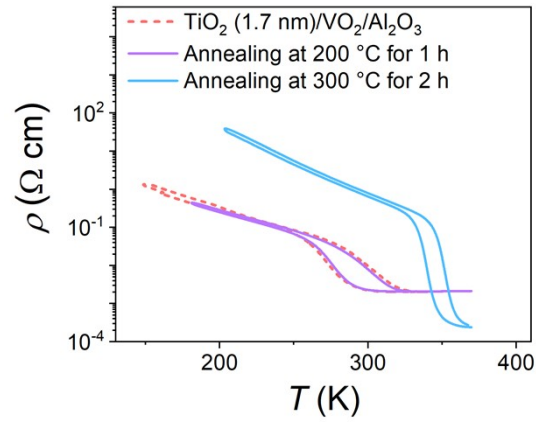

**Supplementary Figure 8.** The  $\rho$ - $T$  curves for  $\text{TiO}_2/\text{VO}_2/\text{Al}_2\text{O}_3$  heterostructure through oxidative annealing. Upon oxidative annealing at 300 °C for 2 h under ambient atmosphere, the defect-driven depression of the IMT functionality in  $\text{VO}_2$  reversibly transits toward the pristine state, exhibiting a  $T_{\text{IMT}}$  similar to that of stoichiometric  $\text{VO}_2$ .

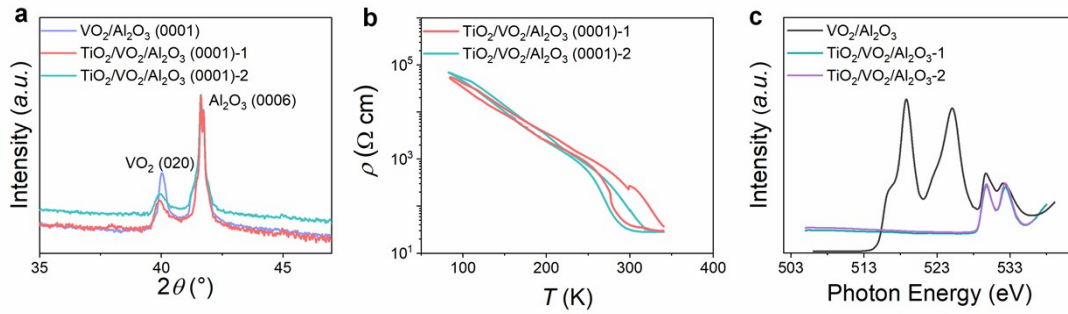

**Supplementary Figure 9.** **a**, X-ray diffraction (XRD) patterns **b**, temperature dependence of material resistivity ( $\rho$ - $T$ ) curves and **c**, soft X-ray absorption spectroscopy (sXAS) spectra compared for underlying  $\text{VO}_2$  layer with and without  $\text{TiO}_2$  overlayer. Analogous to the findings shown in the main text, oxygen deficiency in underlying  $\text{VO}_2$  layer through directional oxygen ionic transport results in the lattice expansion and carrier delocalization. Furthermore, defect-associated band-filling control over the electronic band structure of  $\text{VO}_2$  is demonstrated by the reduced  $t_{2g}/e_g$  peak intensity ratio in their O- $K$  edge sXAS spectra.<sup>8-11</sup>

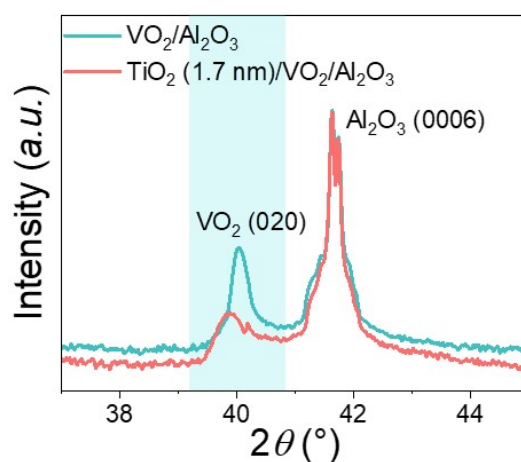

**Supplementary Figure 10.** XRD patterns compared for the VO<sub>2</sub>/Al<sub>2</sub>O<sub>3</sub> heterostructure with and without a 1.7 nm-thick TiO<sub>2</sub> overlayer. Similar to the TiO<sub>2</sub> (13 nm)/VO<sub>2</sub>/Al<sub>2</sub>O<sub>3</sub> heterojunction, the introduction of an ultra-thin 1.7 nm TiO<sub>2</sub> overlayer induces oxygen ion migration driven by the chemical potential difference between the underlying VO<sub>2</sub> and the intermediate TiO<sub>2</sub> layer. This process leads to the formation of an oxygen-deficient VO<sub>2-x</sub> phase in the bottom VO<sub>2</sub> layer, accompanied by corresponding lattice expansion.

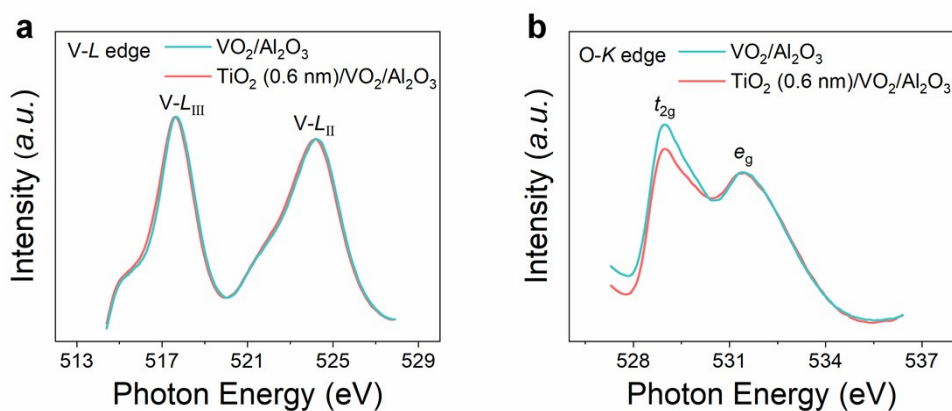

**Supplementary Figure 11.** The **a**, V-*L* edge and **b** O-*K* edge of sXAS spectra compared for the VO<sub>2</sub>/Al<sub>2</sub>O<sub>3</sub> heterostructure with and without the 0.6 nm-thick TiO<sub>2</sub> overlayer. By depositing an ultrathin TiO<sub>2</sub> overlayer on VO<sub>2</sub> thin films, the electron occupancy in the *t*<sub>2g</sub> orbital is evident by a reduced *t*<sub>2g</sub>/*e*<sub>g</sub> peak intensity ratio in their O-*K* edge sXAS spectra. In contrast, no pronounced spectral shift is detected at the V-*L* edge for VO<sub>2</sub> after capped with the TiO<sub>2</sub> overlayer, likely attributable to an insufficient thickness of the TiO<sub>2</sub> capping layer.

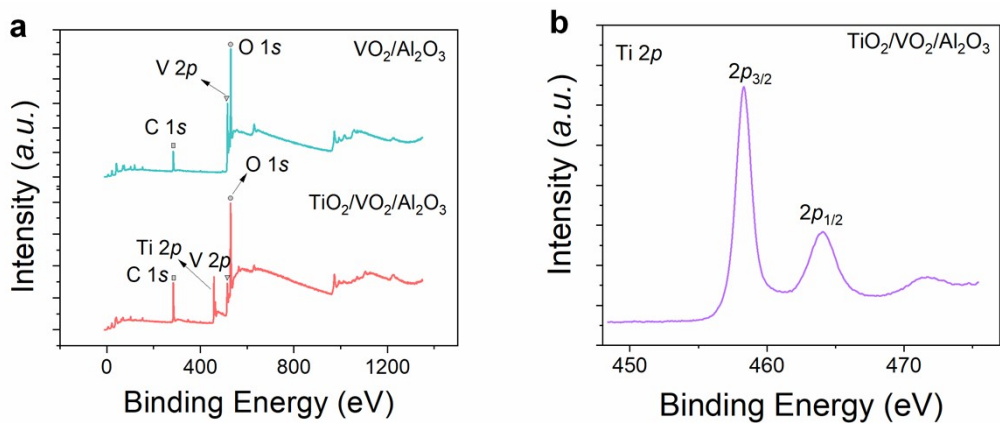

**Supplementary Figure 12. a**, Comparative XPS survey spectra of  $\text{VO}_2/\text{Al}_2\text{O}_3$  heterostructures with and without  $\text{TiO}_2$  capping layer. **b**, Ti 2p energy level of XPS spectrum for the  $\text{TiO}_2/\text{VO}_2/\text{Al}_2\text{O}_3$  heterostructure. It is noteworthy that the characteristic Ti 2p peaks observed for the  $\text{TiO}_2/\text{VO}_2/\text{Al}_2\text{O}_3$  heterostructure identify the presence of  $\text{TiO}_2$  overlayer, contrasting sharply with the absent Ti 2p signal in  $\text{VO}_2/\text{Al}_2\text{O}_3$  hybrid.

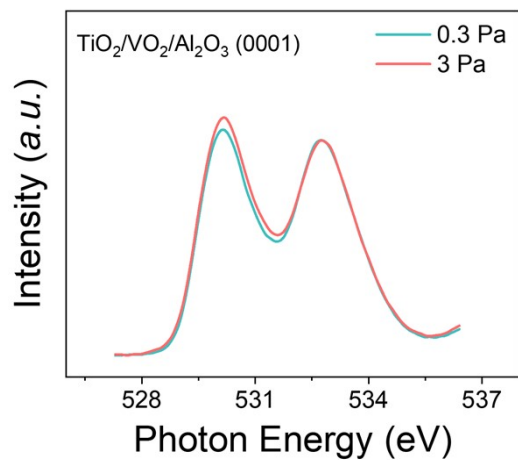

**Supplementary Figure 13.** The sXAS spectra compared for the underlying VO<sub>2</sub> layer capped with TiO<sub>2</sub> overlayers deposited at different oxygen pressures. A lower  $P_{o_2}$  used during TiO<sub>2</sub> growth tends to render a more pronounced the reduction in the intensity ratio of the  $t_{2g}$  peak to the  $e_g$  peak of underlying VO<sub>2</sub>. This systematic decrease in the  $t_{2g}/e_g$  ratio indicates an enhanced electron filling in the low-energy  $t_{2g}$  orbitals of VO<sub>2</sub>, which is attributed to an increased oxygen vacancy concentration in the VO<sub>2</sub> lattice via an accelerated oxygen ionic dynamics.

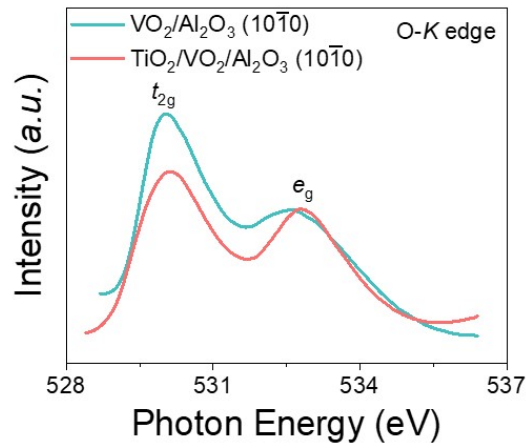

**Supplementary Figure 14.** The O-*K* edge of sXAS spectra of VO<sub>2</sub> film deposited on the *m*-plane Al<sub>2</sub>O<sub>3</sub> substrates. Oxygen deficiency in underlying VO<sub>2</sub> layer through directional oxygen ionic transport is demonstrated by a decreased  $t_{2g}/e_g$  ratio in its O-*K* edge spectra, owing to the defect-related electron doping. These findings indicate that whether vertically nor inclined domain boundary configuration in the lattice can offer an efficient pathway for oxygen ionic diffusion, differing from the horizontally aligned ones.

**Table S1** The ratio of the peak area and FWHM of the first peak to that of the second peak in the V-L edge of sXAS spectra.

| Sample                                     | Peak area of $t_{2g}$ | Peak area of $e_g$ | Peak area ratio (first/second) |
|--------------------------------------------|-----------------------|--------------------|--------------------------------|
| VO <sub>2</sub>                            | 0.68786               | 1.33396            | 0.5157                         |
| TiO <sub>2</sub> (1.7 nm) /VO <sub>2</sub> | 0.26273               | 2.43603            | 0.1079                         |

  

| Sample                                     | FWHM of $t_{2g}$ | FWHM of $e_g$ | FWHM ratio (first/second) |
|--------------------------------------------|------------------|---------------|---------------------------|
| VO <sub>2</sub>                            | 1.2036           | 2.8864        | 0.4169                    |
| TiO <sub>2</sub> (1.7 nm) /VO <sub>2</sub> | 0.8849           | 3.9692        | 0.2229                    |

## Supplementary References

1. Z. Zhang, F. Zuo, C. H. Wan, A. Dutta, J. Kim, J. Rensberg, R. Nawrodt, H. H. Park, T. J. Larrabee, X. F. Guan, Y. Zhou, S. M. Prokes, C. Ronning, V. M. Shalaev, A. Boltasseva, M. A. Kats and S. Ramanathan, *Phys. Rev. Appl.*, 2017, **7**, 034008.
2. X. Zhou, X. Yao, X. Qiao, J. Ji, G. Zhou, H. Ji and X. Xu, *Small*, 2025, DOI: <https://doi.org/10.1002/sml.202510736>, e10736.
3. H. Sim, K.-Y. Doh, Y. Park, K. Song, G.-Y. Kim, J. Son, D. Lee and S.-Y. Choi, *Small*, 2024, **20**, 2402260.
4. Y. Park, H. Sim, K.-Y. Doh, M. Jo, D. Lee, S. Y. Choi and J. Son, *Nano Lett.*, 2022, **22**, 9306-9312.
5. Y. Park, H. Sim, M. Jo, G.-Y. Kim, D. Yoon, H. Han, Y. Kim, K. Song, D. Lee, S.-Y. Choi and J. Son, *Nat. Commun.*, 2020, **11**, 1401.
6. J. Park, H. Yoon, H. Sim, S. Y. Choi and J. Son, *ACS Nano*, 2020, **14**, 2533-2541.
7. X. Zhou, X. Yao, W. Lu, J. Guo, J. Ji, L. Lang, G. Zhou, C. Yao, X. Qiao, H. Ji, Z. Yuan and X. Xu, *Adv. Sci.*, 2025, DOI: <https://doi.org/10.1002/advs.202510771>, e10771.
8. A. Pofelski, H. Jia, S. Deng, H. Yu, T. J. Park, S. Manna, M. K. Y. Chan, S. K. R. S. Sankaranarayanan, S. Ramanathan and Y. Zhu, *Nano Lett.*, 2024, **24**, 1974-1980.
9. B. Li, M. Hu, H. Ren, C. Hu, L. Li, G. Zhang, J. Jiang and C. Zou, *J. Phys. Chem. Lett.*, 2020, **11**, 10045-10051.
10. S. Chen, Z. Wang, H. Ren, Y. Chen, W. Yan, C. Wang, B. Li, J. Jiang and C. Zou, *Sci. Adv.*, 2019, **5**, eaav6815.
11. Y. L. Chen, Z. W. Wang, S. Chen, H. Ren, L. X. Wang, G. B. Zhang, Y. L. Lu, J. Jiang, C. W. Zou and Y. Luo, *Nat. Commun.*, 2018, **9**, 818.
